1        **Learning causal biological networks with the principle of Mendelian randomization**

2

3                                **Md. Bahadur Badsha<sup>1\*</sup> and Audrey Qiuyan Fu<sup>1\*</sup>**

4

5        <sup>1</sup> Department of Statistical Science, Institute for Bioinformatics and Evolutionary Studies, Center  
6                                for Modeling Complex Interactions, University of Idaho, Moscow, ID, USA.

7        \*Corresponding author (mdbadsha@uidaho.edu; audreyf@uidaho.edu)

8

9        Although large amounts of genomic data are available, it remains a challenge to reliably infer  
10        causal relationships among molecular phenotypes (such as gene expression), especially when  
11        many phenotypes are involved. We present MRPC, which learns a causal biological network  
12        efficiently and robustly from integrating genotype and molecular phenotype data, in which  
13        directed edges indicate causal directions. MRPC is the first machine learning algorithm that  
14        incorporates the Principle of Mendelian randomization (PMR) in classical algorithms for  
15        learning causal graphs in computer science. We demonstrate through simulation that MRPC  
16        outperforms existing general-purpose network inference methods and methods using the PMR.  
17        We apply MRPC to distinguish direct and indirect targets among multiple genes associated with  
18        expression quantitative trait loci (eQTLs). We also construct a causal network for frequently  
19        altered cancer genes.

20

21

22

23 Whereas experiments (e.g., temporal transcription or protein expression assays, gene knockouts  
24 or knockdowns) have been conducted to understand the causal relationships among genes<sup>1,2</sup>, or  
25 between an expression quantitative trait loci (eQTL) and its direct and indirect target genes<sup>3</sup>, it  
26 remains a challenge to learn causality directly from genomic data. It is even harder to learn (i.e.,  
27 infer) a causal network, which may represent which genes regulate which other genes. We  
28 address this problem in this paper. Correlation (or association) is often used as a proxy of a  
29 potentially causal relationship, but similar levels of correlation can arise from different causal  
30 mechanisms (Models 1-4 in **Fig. 1a**). For example, between two genes with correlated  
31 expression levels, it is plausible that one gene regulates the other gene (Models 1 and 2 in **Fig.**  
32 **1a**); it is also plausible that they do not regulate each other directly, but both are regulated by a  
33 common genetic variant (Model 3 in **Fig. 1a**).

34  
35 Correlation between the expression, or any molecular phenotype, of two genes is symmetrical –  
36 we cannot infer which of the two genes is the regulator and which the target. However, if a  
37 genetic variant (e.g., a SNP) is significantly associated with the expression of one of the two  
38 genes, then we may assign a directed edge from the variant to the gene, as it is reasonable to  
39 assume that the genotype causes changes in the phenotype (expression), not the other way  
40 around. This additional, directed edge breaks the symmetry between the two genes, and makes it  
41 possible to infer the causal direction (e.g., compare Models 1 and 2 in **Fig. 1a**). [This is the](#)  
42 [rationale behind the Principle of Mendelian Randomization \(PMR\). The randomization principle](#)  
43 [in experimental design \(e.g., clinical trials\) is critical in establishing causality: only when](#)  
44 [subjects are randomly assigned to different exposures is it possible to draw causal connections](#)  
45 [between exposure and outcome. As a randomization principle, the PMR assumes that the alleles](#)

46 of a genetic variant are randomly assigned to individuals in a population, analogous to a natural  
47 perturbation experiment and therefore achieving the goal of randomization<sup>4</sup>. The PMR has been  
48 widely used in epidemiology studies, where genetic variants are used as instrumental variables to  
49 facilitate the estimate of causal effect between a mediator (or exposure, such as gene expression)  
50 and an outcome (e.g., a disease phenotype<sup>4</sup>). It received increasing attention in genetics in recent  
51 years<sup>5-17</sup>

52  
53 Large consortia, such as the GEUVADIS consortium<sup>18</sup> and subsequently the GTEx consortium<sup>19</sup>,  
54 have established the widespread genetic variation (i.e. eQTLs) in human genome that may  
55 regulate gene expression, making PMR-based methods increasingly relevant and important for  
56 understanding interactions among genes. Furthermore, genome-wide association studies  
57 (GWASs) have identified a large number of genetic variants that are potentially causal to  
58 diseases<sup>20</sup>. Understanding the roles of these GWAS-significant variants is key to understanding  
59 the mechanisms underlying diseases. Interestingly, likely half of the GWAS-significant variants  
60 genetic variants are eQTLs<sup>21</sup>. As it becomes more common nowadays to collect gene expression  
61 data in disease studies<sup>6,11</sup>, studying eQTLs (which may also be GWAS-significant SNPs) and  
62 their associated genes provides a powerful approach for a deeper understanding of diseases.

63  
64 The research of complex diseases often focuses on moderately-sized networks of dozens or  
65 hundreds of disease-relevant genes, aiming to identify key regulators and understand the  
66 processes involved<sup>6,11</sup>. Being able to accurately reconstruct the causal network of a moderate set  
67 of genes will help biologists generate testable hypotheses (e.g., which genes are the key

68 regulators and may potentially serve as drug targets) and relate these networks to other  
69 phenotypes, such as drug response.

70

71 However, existing methods adopting the PMR (e.g. the mediation-based methods<sup>12,13</sup>, and the  
72 MR methods<sup>22</sup>) are not directly applicable to inference of a causal network of gene expression.  
73 This is because these methods typically examine the graph of  $V_1 \rightarrow T_1 \rightarrow T_2$  (i.e., Model 1 in **Fig.**  
74 **1a**), where  $V_1$  is the genetic variant,  $T_1$  may represent gene expression, and  $T_2$  a clinical trait.  
75 This graph, called the “causal model” by existing PMR-based methods, is sensible when  $T_2$  is a  
76 potential outcome of  $T_1$ . However, when we examine relationships among gene expression or  
77 other molecular phenotypes, it is usually not known beforehand which of  $T_1$  and  $T_2$  is more likely  
78 to be the outcome of the other, and Model 1 alone does not have the flexibility of examining  
79 other possibilities. As a result, these methods are limited in the causal relationships they can  
80 recover. In this paper, we generalize the interpretation of the PMR to account for a variety of  
81 causal relationships.

82

83 Additionally, applications of the PMR in genomics has not been efficient: existing methods  
84 generally work with a small number of nodes, may require spatial (e.g. locations of genetic  
85 variants on the genome) or temporal information, or tend to add many false positive edges. There  
86 has been some recent effort to address the efficiency issue<sup>13</sup>. Meanwhile, in machine learning, a  
87 class of algorithms, such as those based on the classic PC algorithm<sup>23-27</sup>, have been developed in  
88 over a decade to efficiently learn causal graphs for a large number of nodes. These algorithms  
89 typically consist of two main steps (**Fig. 1b**): i) *inferring the graph skeleton* through a series of  
90 statistical independence tests. The graph skeleton is the same as the final graph except that the

91 edges are undirected; and ii) *determining the direction of the edges* in the skeleton. Variants of  
92 the original PC algorithm have been developed to reduce the impact of the ordering of the nodes  
93 on inference (e.g., the R package pcalg<sup>26,27</sup>), or to reduce the number of statistical tests needed  
94 for inferring the skeleton (e.g., the R package bnlearn<sup>24,25</sup>).

95  
96 Here we develop a new method, namely MRPC, which incorporates the PMR into PC algorithms  
97 and learns a causal graph where the nodes are genetic variants and molecular phenotypes (such  
98 as gene expression), and where the edges between nodes are undirected or directed, with the  
99 direction indicating causality. *Crucially, by combining the PMR with machine learning, our  
100 method is efficient and accurate. Our extended interpretation of the PMR can be thought of as a  
101 way of introducing useful constraints in graph learning and effectively reducing the search space  
102 of possible topologies.* We demonstrated the performance of MRPC on simulated and real data.

103

## 104 **Results**

105 **Multiple causal relationships under the Principle of Mendelian Randomization (PMR).** We  
106 extended the interpretation of the PMR to consider five causal relationships in a triplet of a  
107 genetic variant and two phenotypes, including the “causal model” (**Fig. 1a**). Under the  
108 assumption that genotype influences phenotype and not the other way around, these five models  
109 are mutually exclusive and encompass all possibilities, with Model 0 being the null model where  
110 the two phenotype nodes are not related, and the other four models being non-null models. As  
111 mentioned in the Introduction, Model 1 ( $V_1 \rightarrow T_1 \rightarrow T_2$ ) is typically referred to as the causal model  
112 under standard use of the PMR with  $T_1$  being the exposure (e.g., gene expression) and  $T_2$  being

113 the outcome (e.g., clinical phenotype). `cit`<sup>12,28</sup> and `findr`<sup>13</sup>, two existing PMR-based methods for  
114 example, both focus on testing Model 1.

115 However, Model 1 is limited. Among other possible causal relationships, Model 2 ( $V_1 \rightarrow T_1 \leftarrow T_2$ )  
116 defines a v-structure where both edges point to the same node. This model is suitable when no  
117 genetic variant is available for  $T_2$  in the data. Model 3 ( $V_1 \rightarrow T_1$  and  $V_1 \rightarrow T_2$ ) captures the  
118 scenario where  $T_1$  and  $T_2$  are not directly related, but both regulated by  $V_1$ . The current  
119 interpretation of the PMR in other methods typically rejects these two models in search of the  
120 “causal” model (Model 1). However, under our interpretation of the PMR, Models 2 and 3  
121 describe alternative regulatory mechanisms between two genes, and therefore should also be  
122 allowed when constructing the network of molecular phenotypes. Model 4 ( $V_1 \rightarrow T_1$ ;  $V_1 \rightarrow T_2$ ;  
123  $T_1 - T_2$ ) refers to the case where the two phenotypes  $T_1$  and  $T_2$  have additional dependence  
124 (represented by the undirected edge) on top of that induced by the sharing genetic variant. We  
125 consider undirected and bidirected edges to be equivalent for simplicity, in that an undirected can  
126 be thought of as an average of two equally likely directions, namely M5 ( $V_1 \rightarrow T_1$ ;  $V_1 \rightarrow T_2$ ;  
127  $T_1 \rightarrow T_2$ ) and M6 ( $V_1 \rightarrow T_1$ ;  $V_1 \rightarrow T_2$ ;  $T_1 \leftarrow T_2$ ); in other words,  $M_4 = 1/2 \times M_5 + 1/2 \times M_6$ . M5  
128 and M6 are indistinguishable in terms of their dependence relationships (i.e., they are Markov  
129 equivalent<sup>29</sup>): all pairs of nodes can be marginally dependent and conditionally dependent given  
130 the remaining node. It is plausible that a hidden variable regulates both  $T_1$  and  $T_2$ , although we  
131 currently do not consider hidden variables in our inference.

132

133 **MRPC, a novel causal network learning algorithm.** Our method, namely MRPC, is a novel  
134 causal network inference method for genomic data (**Fig. 1b**; **Supplementary Figs. 1, 2**). This  
135 method analyzes a data matrix with each row being an individual, and each column a genetic

136 variant or a molecular phenotype. Our method also consists of the two main steps as described  
137 above. The first step of learning the graph skeleton is similar to that of other PC algorithms, but  
138 with an online control of the false discovery rate (FDR), which is explained in detail below. We  
139 incorporated the PMR in the second step of edge orientation (**Fig. 1b**; **Supplementary Fig. 2**),  
140 which involves three scenarios: i) MRPC first identify edges involving the genetic variants and  
141 orient these edges to point to the molecular phenotype; ii) MRPC then looks for three nodes with  
142 a potential v-structure (e.g., Model 2 in **Fig. 1a**, or among three molecular phenotypes,  
143  $T_1 \rightarrow T_2 \leftarrow T_3$ ). MRPC conducts additional conditional independence tests if no such test has been  
144 performed in the first step; and iii) among the remaining edges, MRPC iteratively finds node  
145 triplets with only one undirected edge. It examines the results from the independence tests from  
146 the first step to identify which of the five basic topologies is consistent with the test results for  
147 this triplet. In MRPC, we use Fisher's z transformation for Pearson correlation in all the marginal  
148 tests and for the partial correlation in all the conditional tests, consistent with the default method  
149 in pcalg (see "Conditional independence tests based on partial correlations" in Methods).  
150 However, other parametric or nonparametric tests for marginal and conditional independence  
151 tests may be performed in place of Fisher's z transformation test.

152  
153 Existing network inference algorithms (such as those implemented in R packages pcalg and  
154 bnlearn) control the type I error rate for each individual statistical test, but not the family-wise  
155 error rate (FWER) or the FDR, as most methods controlling both the FWER and FDR require the  
156 knowledge of the total number of tests, which is not known in advance in graph learning. Lack of  
157 correction for multiple comparison often leads to too many false edges in the inferred graph,  
158 especially when the graph is large (see our simulation results below). We implemented in MRPC

159 the LOND (Levels based on Number of Discoveries) method for controlling the FDR in an  
160 online manner<sup>30</sup> (see “Sequential FDR control” in Methods). The LOND method estimates the  
161 expected FDR conditioned on the number of tests performed so far and the number of rejections  
162 from these tests.

163  
164 Furthermore, genomic data may contain outliers<sup>31</sup>, which can greatly distort the inferred graph  
165 (see our simulation results below). Like pcalg, MRPC uses the correlation matrix, rather than the  
166 individual-feature matrix, as input. We implemented in MRPC a method for calculating the  
167 robust correlation matrix<sup>31</sup> (see “Calculation of robust correlation” in Methods) in place of  
168 Pearson correlation to alleviate the impact of outliers if they are present.

169  
170 **MRPC outperforms existing network inference algorithms and PMR-based methods on**  
171 **synthetic data in overall accuracy.** We compared MRPC with two popular network inference  
172 algorithms: the pc method (implemented in pcalg) and the mmhc method (implemented in  
173 bnlearn), and three PMR-based methods, namely cit, findr and QPSO<sup>32</sup>. Except for QPSO, which  
174 is implemented in MATLAB, all the methods are implemented in R. We simulated data using  
175 linear models for the five basic topologies, three common topologies in biology<sup>33,34</sup> (such as  
176 multi-parent, star, and layered graphs), as well as a complex topology with over 20 nodes (**Fig.**  
177 **2**). We varied the sample size, as well as the signal strength through the coefficients in the linear  
178 models (see “Generating simulated data” in Methods).

179  
180 For each topology, we generated 1000 data sets with different combinations of signal strength  
181 and sample size, and ran each method with their default parameters. Specifically, we ran MRPC



182 with FDR=0.05, Pearson correlation ( $\beta = 0$ ; see “Sequential FDR control” in Methods) and the  
183 LOND method ( $\alpha = 2$ ; see “Calculation of robust correlation” in Methods). We ran mmhc and  
184 pc with the type I error rate being the default value of 0.05. We explained the procedures for  
185 running other PMR-based methods in the next section.

186  
187 We compared the recall and precision (see “Recall and precision” in Methods) across methods  
188 (**Fig. 3a**; **Supplementary Figs. 3, 4**; **Supplementary Tables 1, 2**). Recall (i.e., power, or  
189 sensitivity) measures how many edges from the true graph a method can recover, whereas  
190 precisions (i.e., 1-FDR) measures how many correct edges are recovered in the inferred graph.  
191 Across different topologies and parameter settings, MRPC has the highest median recall and  
192 precision, with both median recall and median precision above 85%. MRPC is followed by  
193 mmhc, findr, QPSO, pc, with cit trailing far behind (**Fig. 3a**). MRPC recovers the true graph  
194 particularly well at moderate or stronger signal with a medium or larger sample size. For the  
195 complex topology, MRPC performs consistently better than pc and mmhc. This is still the case  
196 when the signal strength is heterogeneous across the complex topology (see “Simulation under  
197 the complex topology with heterogeneous signal strengths” in Methods; **Supplementary Fig. 5**).  
198 Examination of inferred graphs from different methods shows that pc is unable to determine edge  
199 directions or wrongly identifies v-structures when the true model contains none (**Fig. 3b**;  
200 **Supplementary Figs. 6, 7**). PMR-based methods, such as findr and cit, can infer too many or  
201 too few edges, whereas QPSO cannot identify the direction correctly. In the presence of outliers,  
202 MRPC with robust correlation as input substantially outperforms pc and mmhc (**Supplementary**  
203 **Fig. 8**).

204

205 **Existing PMR-based methods cannot deal with complex causal relationships.** We examine  
206 the performance of PMR-based methods more closely in this section. Since cit and findr focus  
207 on Model 1, the topologies they can identify are limited to those that involve primarily Model 1,  
208 such as the star graph and the layered graph: the star graph consists of four M1s, and the layered  
209 graph five (**Fig. 2**). For method comparison, we limited the true graphs to those that can be  
210 analyzed by findr or cit, specifically, M0, M1, M3, star and layered graphs for findr, and M1, star  
211 and layered graphs for cit (see “Application of findr and cit” in Methods).

212  
213 Unlike MRPC, which is agnostic about which genes may be potential regulators and which  
214 potential targets, findr and cit are applied to ordered gene pairs iteratively, requiring specification  
215 of which of the two genes is the potential regulator and which the target. For example, to test  
216 whether the data are simulated under M1, then findr and cit will be performed twice, on  $(V_1, T_1,$   
217  $T_2)$  and then on  $(V_1, T_2, T_1)$ . The number of ordered gene pairs is  $2 \times \binom{5}{2} = 20$  for the star graph  
218 and  $2 \times \binom{7}{2} = 42$  for the layered graph. We applied Bonferroni correction with a familywise  
219 type I error rate of 0.05. Take again the star model with a sample size of 1000 for example,  
220 where we varied the signal strengths in simulation. Although Bonferroni correction is already a  
221 conservative method for multiple testing, findr still sometimes infers more edges than there are  
222 (summarized by the lower precision in **Fig 3a**, also see **Supplementary Fig. 7**), whereas cit may  
223 infer a very dense graph or no edges at all (summarized by low recall and low precision in **Fig.**  
224 **3a**; also see **Fig. 3b** and **Supplementary Figs. 6, 7**).

225  
226 Next, we investigated the performance of findr and cit when the graph skeleton is known, such  
227 that the number of tests is reduced to one on simple models (M0, M1 and M3), and to four in the

228 star graph and to five in the layered graph (**Supplementary Fig. 9**). In other words, potential  
229 regulators and targets are known to findr and cit. For MRPC we continued to assume that the  
230 skeleton was unknown. With known skeletons, both findr and cit performed similarly to, and in  
231 almost all the cases not better than MRPC. The performance of cit can still be much worse than  
232 the other two when the signal strength is low or the sample size is small.

233  
234 We included QPSO in our comparison upon a reviewer's request. Unlike the other five methods  
235 discussed here, QPSO takes a graph skeleton as the input and seeks the optimal orientation of the  
236 edges, its performance therefore depending heavily on how well the skeleton is inferred.

237 Whereas the authors of QPSO used pc to generate the skeleton, we used MRPC to generate the  
238 input, having observed the unsatisfactory performance of pc. As a result, the accuracy of MRPC  
239 in identifying the skeleton gives QPSO an advantage in the performance evaluation over other  
240 methods. A fair comparison is not to compare QPSO directly with all the other methods, but  
241 with MRPC alone. This comparison again shows that QPSO is lacking both in recall and in  
242 precision (**Fig. 3a**). Additionally, QPSO takes much longer time than all the other methods. For  
243 example, the runtime is 21 minutes per data set with the complex topology, compared to 2.5  
244 seconds for MRPC, 0.2 seconds for mmhc, and 0.3 seconds for pc (**Supplementary Table 3**).

245 We therefore calculated recall and precision only for 20 (instead of 1000) data sets in simulation  
246 for QPSO.

247  
248 **Distinguishing direct and indirect targets of eQTLs.** We next applied MRPC to two causal  
249 inference problems that are common in biology. First, we are interested in identifying true targets  
250 when a single SNP is statistically associated with the expression of multiple genes. Multiple

251 genes are potential targets often because these genes are physically close to one another on the  
252 genome, and the eQTL analysis usually examines the association between one SNP-gene pair at  
253 a time, ignoring dependence among genes. Indeed, among eQTLs identified from the  
254 GEUVADIS data<sup>18</sup> (i.e., gene expression measured in lymphoblastoid cell lines, or LCLs, of a  
255 subset of individuals genotyped in the 1000 Genomes Project), 62 eQTLs discovered under the  
256 most stringent criteria have more than one associated gene (see “Analysis of the GEUVADIS  
257 data” in Methods). We applied MRPC to each of these eQTLs and their associated genes in the  
258 373 Europeans, and identified 11 types of topologies (**Fig. 4; Supplementary Table 4**; also see  
259 comparison with mmhc and pc for some of the eQTL-gene sets in **Supplementary Fig. 11**).  
260 Three of these 11 types are Models 1, 3 and 4 shown in **Fig. 1a**. Seven other topologies are  
261 identified for eight eQTLs each with three associated genes (**Supplementary Table 4**).

262  
263 Although the multiple associated genes of the same eQTL are physically near one another, our  
264 method showed promise in teasing apart the different dependence (or regulatory relationships)  
265 among these genes. For example, the SNP rs479844 (chr11:65,784,486; GRCh38), one of the 62  
266 eQTLs, turns out to be significant in at least three GWASs for atopic march and more  
267 specifically, atopic dermatitis (p values ranging from  $10^{-10}$  to  $10^{-18}$ )<sup>20, 35-37</sup>. This SNP has been  
268 linked with two genes, AP5B1 (chr11:65,775,893-65,780,802) and OVOL1 (chr11:65,787,022-  
269 65,797,219), in these GWASs, but it is unclear which is the real target. Our MRPC infers Model  
270 1 for the triplet: rs479844→OVOL1→AP5B1 (**Fig. 4a**), which suggests that OVOL1 is more  
271 likely to be the direct target, and AP5B1 the indirect one. Meanwhile, for HLA-DQA1  
272 (chr6:32,637,403-32,654,846) and HLA-DQB1 (chr6:32,659,464-32,666,689), both genes are  
273 associated with the SNP rs9274660 and located in the major histocompatibility (MHC) region of

274 high linkage disequilibrium. As expected, MRPC infers an undirected edge between the two  
275 genes, as the information on the two genes is highly symmetric in the genotype and gene  
276 expression data. By contrast, mmhc and pc often misspecify edges or their directions  
277 (**Supplementary Fig. 11**). We focused on the European sample in this analysis, as the sample  
278 size of the Africans is small (89). However, we managed to replicate part of the topologies for  
279 the few eQTLs discovered in both populations (see “Analysis of the GEUVADIS data” in  
280 Methods).

281  
282 Since the GTEx consortium<sup>19</sup> contains data also from LCLs, we next examined whether the  
283 causal relationships inferred from the GEUVADIS data may be replicated in the LCL samples  
284 from GTEx (see “Analysis of the GTEx data” in Methods). The sample size of 117 is much  
285 smaller in GTEx, though, which reduces the expected number of causal relationships to be  
286 replicated. We therefore focus on eQTL-gene sets that were inferred to have an M1 model in  
287 GEUVADIS by MRPC. We ran MRPC, findr and cit on the 16 eQTL-gene sets with an M1  
288 model that have the genotype and gene expression data in both GEUVADIS and GTEx LCL  
289 samples. findr replicated 9 sets, MRPC 8 and cit only 1 (**Supplementary Table 5**). This result is  
290 consistent with simulation results (**Fig. 3a**): whether the graph skeleton is known or not, MRPC  
291 and findr have similar performance on M1 across different sample sizes and signal strengths,  
292 both much better than cit. In particular, we replicated the relationship  
293 rs479844→OVOL1→AP5B1 with both MRPC and findr in the GTEx LCL samples.

294  
295 **Construction of a causal network for frequently altered cancer genes.** In the second  
296 application, we applied MRPC to the genomic data of breast cancer patients from the TCGA

297 consortium<sup>38</sup> (see “Analysis of the TCGA breast cancer data” in Methods), aiming to learn the  
298 causal gene regulatory network for frequently altered genes in breast cancer; that is, genes with  
299 point mutations, differential expression and different copy number in a large percentage of  
300 patients<sup>39</sup>. Although these genes have been shown in our previous work to form a dense network  
301 of epistasis and are known to be involved in many pathways known to play an important role in  
302 cancer (e.g., DNA damage repair pathways<sup>40</sup>, kinase signaling pathways<sup>41</sup>, and so on)<sup>39</sup>, how  
303 these genes regulate one another transcriptionally remains unclear.

304  
305 Copy number variation usually has a much stronger effect on gene expression than SNPs do in  
306 breast cancer<sup>42</sup>. We therefore used the copy number variation as the genotype, and gene  
307 expression as the molecular phenotype. Similar to an earlier investigation<sup>39</sup>, we extracted 85  
308 frequently altered genes (e.g., BRCA1, BRCA2, TP53, etc.) in breast cancer and their copy  
309 number variation data. We calculated the Pearson correlation matrix (**Fig. 5a**), and applied  
310 MRPC at FDR=0.05 (**Fig. 5b**), and subsequently at 0.01, 0.10 and 0.15. The inferred graphs  
311 appeared reasonably stable: each graph contains around 200 edges; when the FDR changes by  
312 0.05, the number of edges inferred differently tends to be around 10, which is roughly 1/20 of all  
313 the edges (**Fig. 5c; Supplementary Figs. 12-14**); this is consistent with the change of 0.05 in  
314 FDR, as this rate implies that on average roughly 5% of all the edges are likely to be false  
315 positives and therefore would not be consistently inferred at another FDR. In other words, most  
316 of the edges are inferred reliably across different FDR levels.

317  
318 We searched through literature for evidence supporting the inferred directed edges here  
319 (**Supplementary Table 6**). Existing literature is rich on the undirected relationships among

320 genes, but scarce on directed ones. Among 49 directed edges inferred here, we found literature  
321 support for only seven directed relationships inferred here (including one edge with the reference  
322 indicating an opposite direction), and for undirected relationships of 14 inferred gene pairs  
323 (**Supplementary Table 6**). Considering the thousands of pairwise relationships that may exist  
324 among these genes, the causal graph we have inferred here provides a list of plausible regulatory  
325 relationships and helps prioritize which genes to perform knockdown experiments on.

326

327 In the graph inferred at FDR=5%, one gene (MAML2) has three targets (NFIB, MET, and  
328 PIK3R1), followed by nine genes (ATM, CANT1, ELK4, ERCC4, IL6ST, KMT2C, KMT2E,  
329 MAP3K1, and MET) with two targets, 31 genes with one target, and 44 without targets (**Fig. 5b**).  
330 We then applied WGCNA<sup>43</sup> to help visualize the inferred graphs through grouping nodes into  
331 modules. We experimented with several module sizes, and in the end divided the graph into  
332 modules with at least seven nodes (including four genes) per module, such that all the visibly  
333 large clusters of nodes were represented (**Fig. 5b; Supplementary Fig. 15; Supplementary**  
334 **Table 7**). Genes have higher connectivity within the module than with other modules, although  
335 most modules have edges connecting one another, consistent with the notion that multiple  
336 biological pathways are involved, and possibly interacting in cancer<sup>39</sup> (**Fig. 5b**). We ran gene  
337 ontology (GO) enrichment analysis<sup>44</sup> on the genes in each module (excluding the grey nodes,  
338 which are not allocated to any module). Except for the green module, which contains only four  
339 genes, each module is significantly associated with distinct biological processes or PANTHER  
340 pathways<sup>45</sup>, suggesting that the causal network we learned has a structure consistent with the  
341 underlying biological functions (**Fig. 5b; Supplementary Tables 8, 9**).

342

343 Additionally, our causal inference distinguishes “direct” from “indirect” correlation. For example,  
344 following hierarchical clustering, the correlation heatmap indicates that NF1, ERCC4, and  
345 TRIP11 have higher correlation with one another and are therefore clustered together (**Fig. 5a**).  
346 However, no edge connects NF1 and ERCC4 at any of the FDRs we examined (**Fig. 5b**;  
347 **Supplementary Figs. 12-14**). A closer look at the conditional independence tests showed that  
348 the strong correlation between these two genes is explained away by TRIP11, BRCA1 and the  
349 copy number variation of NF1 (p value:  $3e-6$ ; the significance threshold by LOND method:  $5e-7$ ).  
350 In other words, the correlation between NF1 and ERCC4 is indirect: it is induced by association  
351 with three other nodes. Indeed, there is no interaction between NF1 and ERCC4 in the literature  
352 to the best of our knowledge. Instead, NF1 has been shown to interact with the KMT2 family<sup>40</sup>,  
353 also shown in our inferred network (**Fig. 5b**), whereas the DNA repair gene ERCC4 is recently  
354 shown to be involved in the translesion DNA synthesis together with TRIP11 and other genes<sup>46</sup>,  
355 consistent with the edge between these two genes in our inferred network (**Fig. 5b**).

356

## 357 **Discussion**

358 In summary, we have developed MRPC to infer causal networks, which can be an NP-complete  
359 problem (see “Properties of MRPC” in Methods). Our MRPC method examines a variety of  
360 causal relationships implied by the PMR, and takes advantage of the development of machine  
361 learning algorithms for causal graph inference. MRPC integrates genotypes with molecular  
362 phenotypes, and can efficiently and accurately learn causal networks. Our method is flexible as it  
363 requires only the genotype data (SNPs or other types of variants; see “Multiple genetic variants  
364 of the same phenotype” in Methods) and the molecular phenotype measurements (gene  
365 expression, or other functional data, such as exon expression, RNA editing, DNA methylation,



366 etc.), and can be applied to a wide range of causal inference problems. Our method is also  
367 nonparametric in that no explicit distributions are assumed for the underlying graph. MRPC uses  
368 individual-level genomic data to learn plausible biological mechanisms from combining  
369 genotype and molecular phenotypes.

370

371 The key improvements in MRPC over existing methods are i) implementation of the online FDR  
372 control method (the LOND method), which helps reduce false positives. As our simulation  
373 demonstrated, false positive edges are a severe problem in other methods, whether they are based  
374 on the PMR or not; and ii) accounting for all possible causal relationships a triplet with a genetic  
375 variant can have under the PMR. This extended interpretation of the PMR allows MRPC to go  
376 beyond the typical “causal model” examined by other PMR-based methods and can deal with  
377 networks of realistic causal relationships. Computationally, incorporation of the PMR puts  
378 constraints on the space of possible graphs and allows for efficient search of graphs consistent  
379 with the data (see “MRPC and other PMR-based methods” in Methods).

380

381 Here, we demonstrated the outstanding performance of MRPC on small to moderately-sized  
382 graphs. Additional work is needed to extend the ability of MRPC to larger graphs. For example,  
383 median precision of 90% in simulation (Fig. 3a) translates to the actual FDR being 10%, above  
384 the expected level of 5%. We also applied MRPC to the directed networks of 1000 genes and  
385 1000 genetic variants simulated in the DREAM5 Systems Genetics Challenge A<sup>47</sup>, with FDR  
386 being 30% (see “Analysis of the DREAM5 Systems Genetic Challenge A data” in Methods;  
387 **Supplementary Table 10**). With a sample size of 999, our MRPC identified only 19% of 2048  
388 true edges, although precision is 67%, meaning that the actual FDR is 33%, comparable to the

389 expected threshold of 30%. By contrast, the TRANSWESD method<sup>48</sup> (published after the  
390 challenge and showed better performance than the best participating method for this challenge)  
391 recovered 68% of the true edges, but had low precision of only 34%% (mmhc, the second best  
392 performing method compared in this paper, has a similar issue). This suggests that although  
393 controlling the FDR to certain extent, the LOND method can discard too many true positives.

394

395 Like most causal graph learning methods, a key assumption behind MRPC is that there are no  
396 hidden nodes that are connected to the observed nodes in the graph. Whereas this assumption  
397 may not hold in biology, we can take additional measures to alleviate the impact of hidden nodes.  
398 For example, genes are often grouped in clusters that tend to have higher correlation within the  
399 cluster. Our method can be applied to genes within a gene cluster to build the detailed causal  
400 network. As the next step, we are working on extensions of MRPC to deal with hidden variables<sup>7</sup>,  
401 <sup>26</sup>. The current version of MRPC has already demonstrated its power in tackling several  
402 biological problems on causality and in integrating large amounts of genomic data.

403

- 404 1. Segal E, *et al.* Module networks: identifying regulatory modules and their condition-  
405 specific regulators from gene expression data. *Nat Genet* **34**, 166-176 (2003).
- 406 2. Housden BE, *et al.* Transcriptional dynamics elicited by a short pulse of notch activation  
407 involves feed-forward regulation by E(spl)/Hes genes. *PLoS Genet* **9**, e1003162 (2013).
- 408 3. Cheung VG, Spielman RS. Genetics of human gene expression: mapping DNA variants  
409 that influence gene expression. *Nat Rev Genet* **10**, 595-604 (2009).
- 410 4. Davey Smith G, Hemani G. Mendelian randomization: genetic anchors for causal  
411 inference in epidemiological studies. *Hum Mol Genet* **23**, R89-98 (2014).

- 412 5. Hill SM, *et al.* Inferring causal molecular networks: empirical assessment through a  
413 community-based effort. *Nat Methods* **13**, 310-318 (2016).
- 414 6. Zhang B, *et al.* Integrated systems approach identifies genetic nodes and networks in late-  
415 onset Alzheimer's disease. *Cell* **153**, 707-720 (2013).
- 416 7. Chaibub Neto E, *et al.* Modeling causality for pairs of phenotypes in system genetics.  
417 *Genetics* **193**, 1003-1013 (2013).
- 418 8. Gutierrez-Arcelus M, *et al.* Passive and active DNA methylation and the interplay with  
419 genetic variation in gene regulation. *Elife* **2**, e00523 (2013).
- 420 9. Oren Y, Nachshon A, Frishberg A, Wilentzik R, Gat-Viks I. Linking traits based on their  
421 shared molecular mechanisms. *Elife* **4**, e04346 (2015).
- 422 10. Stojnic R, Fu AQ, Adryan B. A graphical modelling approach to the dissection of highly  
423 correlated transcription factor binding site profiles. *PLoS Comput Biol* **8**, e1002725  
424 (2012).
- 425 11. Franzen O, *et al.* Cardiometabolic risk loci share downstream cis- and trans-gene  
426 regulation across tissues and diseases. *Science* **353**, 827-830 (2016).
- 427 12. Millstein J, Zhang B, Zhu J, Schadt EE. Disentangling molecular relationships with a  
428 causal inference test. *BMC genetics* **10**, 23 (2009).
- 429 13. Wang L, Michoel T. Efficient and accurate causal inference with hidden confounders  
430 from genome-transcriptome variation data. *PLoS Comput Biol* **13**, e1005703 (2017).
- 431 14. Zhu J, *et al.* Stitching together multiple data dimensions reveals interacting metabolomic  
432 and transcriptomic networks that modulate cell regulation. *PLoS Biol* **10**, e1001301  
433 (2012).

- 434 15. Huang YT, Liang L, Moffatt MF, Cookson WO, Lin X. iGWAS: Integrative genome-  
435 wide association studies of genetic and genomic data for disease susceptibility using  
436 mediation analysis. *Genet Epidemiol* **39**, 347- 356 (2015).
- 437 16. Yang F, Wang J, The GTEx Consortium, Pierce BL, Chen LS. Identifying cis-mediators  
438 for trans-eQTLs across many human tissues using genomic mediation analysis. *Genome*  
439 *Res* **27**, 1859-1871 (2017).
- 440 17. Connor LJ, Price AL. Distinguishing genetic correlation from causation across 52  
441 diseases and complex traits. *bioRxiv*, 205435 (2017).
- 442 18. Lappalainen T, *et al.* Transcriptome and genome sequencing uncovers functional  
443 variation in humans. *Nature* **501**, 506-511 (2013).
- 444 19. The GTEx Consortium. Genetic effects on gene expression across human tissues. *Nature*  
445 **550**, 204-213 (2017).
- 446 20. MacArthur J, *et al.* The new NHGRI-EBI Catalog of published genome-wide association  
447 studies (GWAS Catalog). *Nucleic Acids Res* **45**, D896-d901 (2017).
- 448 21. Nicolae DL, Gamazon E, Zhang W, Duan S, Dolan ME, Cox NJ. Trait-associated SNPs  
449 are more likely to be eQTLs: annotation to enhance discovery from GWAS. *PLoS Genet*  
450 **6**, e1000888 (2010).
- 451 22. Hemani G, Tilling K, Davey Smith G. Orienting the causal relationship between  
452 imprecisely measured traits using GWAS summary data. *PLoS Genet* **13**, e1007081  
453 (2017).
- 454 23. Spirtes P, Glymour C, Scheines R. *Causation, Prediction, and Search*. The MIT Press,  
455 (2000).

- 456 24. Tsamardinos I, Brown LE, Aliferis CF. The max-min hill-climbing Bayesian network  
457 structure learning algorithm. *Machine Learning* **65**, 31-78 (2006).
- 458 25. Scutari M. Learning Bayesian networks with the bnlearn R package. *J. Stat. Softw.* **35**, 22  
459 (2010).
- 460 26. Kalisch M, Mächler M, Colombo D, Maathuis MH, Bühlmann P. Causal inference using  
461 graphical models with the R package pcalg. *J. Stat. Softw.* **47**, 26 (2012).
- 462 27. Colombo D, Maathuis MH. Order-independent constraint-based causal structure learning.  
463 *J. Mach. Learn. Res.* **15**, 3741-3782 (2014).
- 464 28. Millstein J, Chen GK, Breton CV. cit: hypothesis testing software for mediation analysis  
465 in genomic applications. *Bioinformatics* **32**, 2364-2365 (2016).
- 466 29. Richardson T. A characterization of Markov equivalence for directed cyclic graphs. *Int J*  
467 *of Approx Reason* **17**, 107-162 (1997).
- 468 30. Javanmard A, Montanari A. On online control of false discovery rate. *arXiv*  
469 150206197v2, (2015).
- 470 31. Badsha MB, Mollah MN, Jahan N, Kurata H. Robust complementary hierarchical  
471 clustering for gene expression data analysis by beta-divergence. *J Biosci Bioeng* **116**,  
472 397-407 (2013).
- 473 32. Wang H, van Eeuwijk FA. A new method to infer causal phenotype networks using QTL  
474 and phenotypic information. *PLoS One* **9**, e103997 (2014).
- 475 33. Alon U. Network motifs: theory and experimental approaches. *Nat Rev Genet* **8**, 450-461  
476 (2007).
- 477 34. Hunter T. Signaling--2000 and beyond. *Cell* **100**, 113-127 (2000).

- 478 35. Marenholz, I., Esparza-Gordillo, J., Rüschen-dorf, F., Bauerfeind, A., Strachan, D.P.,  
479 Spycher, B.D., Baurecht, H., Margaritte-Jeannin, P., Sääf, A., Kerkhof, M., Ege, M.  
480 Meta-analysis identifies seven susceptibility loci involved in the atopic march. *Nat*  
481 *Commun* **6**, 8804 (2015).
- 482 36. Paternoster L, *et al.* Multi-ancestry genome-wide association study of 21,000 cases and  
483 95,000 controls identifies new risk loci for atopic dermatitis. *Nat Genet* **47**, 1449-1456  
484 (2015).
- 485 37. Paternoster L, *et al.* Meta-analysis of genome-wide association studies identifies three  
486 new risk loci for atopic dermatitis. *Nat Genet* **44**, 187-192 (2011).
- 487 38. The Cancer Genome Atlas Network. Comprehensive molecular portraits of human breast  
488 tumours. *Nature* **490**, 61-70 (2012).
- 489 39. Wang X, Fu AQ, McEnerney ME, White KP. Widespread genetic epistasis among cancer  
490 genes. *Nat Commun* **5**, 4828 (2014).
- 491 40. Rao RC, Dou Y. Hijacked in cancer: the KMT2 (MLL) family of methyltransferases. *Nat*  
492 *Rev Cancer* **15**, 334-346 (2015).
- 493 41. Martini M, De Santis MC, Braccini L, Gulluni F, Hirsch E. PI3K/AKT signaling pathway  
494 and cancer: an updated review. *Ann Med* **46**, 372-383 (2014).
- 495 42. Li, Q., Seo, J.H., Stranger, B., McKenna, A., Pe'er, I., LaFramboise, T., Brown, M.,  
496 Tyekucheva, S., Freedman, M.L. Integrative eQTL-based analyses reveal the biology of  
497 breast cancer risk loci. *Cell* **152**, 633-641 (2013).
- 498 43. Langfelder P, Horvath S. WGCNA: an R package for weighted correlation network  
499 analysis. *BMC Bioinformatics* **9**, 559 (2008).

- 500 44. Gene Ontology Consortium. Gene Ontology Consortium: going forward. *Nucleic Acids*  
501 *Res* **43**, D1049-1056 (2015).
- 502 45. Mi H, Muruganujan A, Thomas PD. PANTHER in 2013: modeling the evolution of gene  
503 function, and other gene attributes, in the context of phylogenetic trees. *Nucleic Acids Res*  
504 **41**, D377-386 (2013).
- 505 46. Ziv O, *et al.* Identification of novel DNA-damage tolerance genes reveals regulation of  
506 translesion DNA synthesis by nucleophosmin. *Nat Commun* **5**, 5437 (2014).
- 507 47. Cokelaer T, *et al.* DREAMTools: a Python package for scoring collaborative challenges  
508 [version 1; referees: 3 approved with reservations]. *F1000Research*, 4:1030 (2016).
- 509 48. Flassig RJ, Heise S, Sundmacher K, Klamt S. An effective framework for reconstructing  
510 gene regulatory networks from genetical genomics data. *Bioinformatics* **29**, 246-254  
511 (2013).

512

513

## 514 **METHODS**

515 **Conditional independence tests based on partial correlations.** We use the same method (and  
516 R functions) as that used in the R package `pcalg`<sup>26</sup> for conducting conditional independence tests  
517 based on partial correlations. Consider testing conditional independence between variables  $x$   
518 and  $y$  conditioned on a set of variables  $S$ . From the correlation matrix, one may estimate the  
519 partial correlations using an iterative approach<sup>26</sup>. Then application of Fisher's  $z$  transformation  
520 gives the test statistic

$$T = \frac{\sqrt{n - |S| - 3}}{2} \log \left( \frac{1 + \hat{r}_{x,y|S}}{1 - \hat{r}_{x,y|S}} \right),$$

521 which follows  $N(0,1)$  under the null hypothesis of conditional independence<sup>49</sup>. In the expression  
522 above,  $\hat{r}_{x,y|S}$  is the estimated partial correlation,  $n$  the sample size, and  $|S|$  the number of  
523 variables in the set  $S$ .

524

525 **Calculation of robust correlation.** We implemented the method in Badsha et al.<sup>31</sup> to calculate  
526 the robust correlation matrix as the input to the MRPC inference. Specifically, for data that are  
527 approximately normal (usually after preprocessing of the data), we calculated iteratively the  
528 robust mean vector  $\boldsymbol{\mu}$  and the robust covariance matrix  $\boldsymbol{v}$  until convergence. At the  $t+1$ st iteration,

529 
$$\boldsymbol{\mu}_{t+1} = \frac{\sum_{i=1}^n [\varphi_{\beta}(\mathbf{x}_i; \boldsymbol{\mu}_t, \boldsymbol{v}_t) \mathbf{x}_i]}{\sum_{i=1}^n \varphi_{\beta}(\mathbf{x}_i; \boldsymbol{\mu}_t, \boldsymbol{v}_t)} \quad (1)$$

530 and

531 
$$\boldsymbol{v}_{t+1} = \frac{\sum_{i=1}^n [\varphi_{\beta}(\mathbf{x}_i; \boldsymbol{\mu}_t, \boldsymbol{v}_t) (\mathbf{x}_i - \boldsymbol{\mu}_t) (\mathbf{x}_i - \boldsymbol{\mu}_t)^T]}{(1+\beta)^{-1} \sum_{i=1}^n \varphi_{\beta}(\mathbf{x}_i; \boldsymbol{\mu}_t, \boldsymbol{v}_t)}, \quad (2)$$

532 where,

533 
$$\varphi_{\beta}(\mathbf{x}; \boldsymbol{\mu}, \boldsymbol{v}) = \exp\left(-\frac{\beta}{2} (\mathbf{x} - \boldsymbol{\mu})^T \boldsymbol{v}^{-1} (\mathbf{x} - \boldsymbol{\mu})\right). \quad (3)$$

534 In the equations above,  $\mathbf{x}_i$  is the vector of gene expression in the  $i$ th sample,  $n$  the sample size,  
535 and  $\beta$  the tuning parameter. Equation (3) downweights the outliers through  $\beta$ , which takes values  
536 in  $[0,1]$ . Larger  $\beta$  leads to smaller weights on the outliers. When  $\beta = 0$ , equation (2) is similar to  
537 the standard definition of the variance, except that the scalar is  $1/n$ , whereas the unbiased  
538 estimator of the variance has a scalar of  $1/(n-1)$ . When the data matrix contains missing values,  
539 we perform imputation using the R package `mice`<sup>50</sup>. Alternatively, one may impute the data using  
540 other appropriate methods, and calculate the correlation matrix as the input for MRPC.

541



542 When analyzing simulated data with no outliers, we set  $\beta = 0$ , which is close to Pearson  
543 correlation. We set  $\beta = 0.005$  if outliers were included in simulation. On real data, we would  
544 usually perform two analyses with  $\beta = 0$  and  $\beta = 0.005$ . These two values did not lead to  
545 different results in most cases. See details in “Analysis of the GEUVADIS data” in Methods,  
546 which refers to **Supplementary Figures 16-18**.

547

548 **Sequential FDR control.** We implemented the LOND algorithm that control FDR in an online  
549 manner, as we did not know the number of tests beforehand in learning the causal graph.  
550 Specifically, consider a sequence of null hypotheses (marginal or conditional independence  
551 between two molecular phenotypes)  $H(m) = H_1, H_2, H_3, \dots, H_m$ , with corresponding  $p$ -values  
552  $p(m) = p_1, p_2, p_3, \dots, p_m$ . The LOND algorithm aims to determine a sequence of significance  
553 level  $\alpha_i$ , such that the decision for the  $i$ th test is

$$554 \quad R_i = \begin{cases} 1, & \text{if } p_i \leq \alpha_i & \text{(reject } H_i) \\ 0, & \text{if } p_i > \alpha_i & \text{(accept } H_i) \end{cases}$$

555 The number of rejections over  $m$  tests is then

$$556 \quad D_{(m)} = \sum_{i=1}^m R_i.$$

557 For the overall FDR to be  $\delta$ , the significance level  $\alpha_i$  is set to be

$$558 \quad \alpha_i = \delta_i [D_{(i-1)} + 1],$$

559 where the FDR for the  $i$ th test is

$$560 \quad \delta_i = \frac{c}{i^a},$$

561 such that

$$562 \quad \sum_{i=1}^{\infty} \delta_i = \delta,$$

563 for integer  $a > 1$  and a constant  $c$ . We choose a nonnegative sequence  $\delta_i$ , such that  $\sum_{i=1}^{\infty} \delta_i =$   
564 *FDR*. The default value for  $a$  is set to 2 in MRPC. At an *FDR* of 0.05 and  $a = 2$ , we have

$$565 \quad \sum_{i=1}^{\infty} \delta_i = \sum_{i=1}^{\infty} \frac{c}{i^2} = c \sum_{i=1}^{\infty} \frac{1}{i^2} = \frac{c\pi^2}{6} = 0.05.$$

566 Then

$$567 \quad c = \frac{6 \cdot 0.05}{\pi^2} = 0.0304.$$

568 Values of  $\delta_i$  and  $\alpha_i$  for the first 18 tests of analysis of a simulated data set are listed in an  
569 example given in **Supplementary Table 11**. The larger  $a$  is, the more conservative the LOND  
570 method, which means that fewer rejections will be made. We therefore used  $a = 2$  throughout  
571 simulation and real data analyses. Simulation results in the Results section show that this choice  
572 of  $a$  works reasonably well for small and moderately-sized networks, although it can lead to  
573 exclusion of many true edges in large networks (see “Analysis of the DREAM5 Systems Genetic  
574 Challenge A data” in Methods).

575

576 **Multiple genetic variants of the same phenotype.** MRPC currently does not directly deal with  
577 multiple genetic variants associated with the same molecular phenotype. For network inference,  
578 we recommend using the variant with the strongest association, or merging the multiple variants  
579 to create a haplotype variant with the haplotypes being the new genotypes (e.g., two SNPs in  
580 linkage disequilibrium, each having three genotypes, can be merged into one variant with  
581 genotypes 00, 01, 02, 10, 11, 12, 20, 21, and 22).

582

583 **Generating simulated data.** We generated synthetic data for a variety of graphs, which fall into  
584 three categories depending on the complexity (**Fig. 2a**): i) basic topologies of a triplet; ii)  
585 topologies common in biological networks: star (i.e., one molecular phenotype has multiple

586 targets); multi-parent (i.e., one molecular phenotype has multiple regulators apart from the  
587 genetic variants); and layered; and iii) a complex topology.

588  
589 In each topology, we simulated the data first for the nodes without parents, and then for other  
590 nodes. Genetic variants are nodes without parents, and we assume them to be biallelic SNPs with  
591 three genotypes 0, 1, and 2. Denote the minor allele frequency by  $q$  and assume Hardy-Weinberg  
592 equilibrium. Then the genotype of the  $i$ th variant,  $V_i$ , follows a multinomial distribution:

593 
$$\Pr(V_i = 0) = (1 - q)^2, \Pr(V_i = 1) = 2q(1 - q), \Pr(V_i = 2) = q^2.$$

594 Denote the  $j$ th molecular phenotype by  $T_j$  and the set of its parent nodes by  $P$ , which may be  
595 empty, or may include variant nodes or nodes of other molecular phenotypes. We assume that  
596 the molecular phenotype  $T_j$  follows a normal distribution

597 
$$T_j \sim N(\gamma_0 + \sum_{k \in P} \gamma_k V_k + \sum_{l \in P} \gamma_l T_l, \sigma_j^2).$$

598 The variance may be different for different nodes. For simplicity, we use the same value for all  
599 the nodes.

600  
601 We treat undirected edges as bidirected edges and interpret such an edge as an average of the two  
602 directions with equal weights. For example, for the undirected edge in Model 4 in **Fig. 1a**, we  
603 generate data for  $T_1 \rightarrow T_2$ :

604 
$$T_1 \sim N(\gamma_0 + \gamma_1 V, \sigma_1^2); T_2 \sim N(\gamma_0 + \gamma_1 V + \gamma_2 T_1, \sigma_2^2),$$

605 and separately for  $T_1 \leftarrow T_2$ :

606 
$$T_1 \sim N(\gamma_0 + \gamma_1 V + \gamma_2 T_2, \sigma_1^2); T_2 \sim N(\gamma_0 + \gamma_1 V, \sigma_2^2).$$

607 We then randomly choose a pair of values with 50:50 probability for each sample.

608

609 For simplicity in simulation, we set  $\gamma_0 = 0$  and all the other  $\gamma$ 's to take the same value, which  
610 reflects the strength of the association signal. We considered three values for the slopes: 0.2  
611 (weak signal), 0.5 (moderate signal), and 1.0 (strong signal). We also varied the sample size: 50  
612 (very small), 200 (small), 500 (medium), and 1000 (large). Thus, we considered twelve  
613 combinations of signal strength and sample size (**Supplementary Figs. 3, 4; Supplementary**  
614 **Tables 1, 2**).

615

616 Under each combination, we generated 1000 data sets for each topology. For each data set, we  
617 shuffled the columns corresponding to gene expression to generate one data set with those  
618 columns reordered; if an inference method is sensitive to the ordering of the columns, the  
619 inferred graph would have a large variance across data sets. We then applied each method to a  
620 data set with permuted columns. To summarize the results, we computed the mean and standard  
621 deviation of recall and precision (see “Recall and precision” in Methods) across 1000 data sets  
622 for each method, and displayed the mean as the bar and the standard deviation as the error bar in  
623 the horizontal bar plots (**Supplementary Figs. 3, 4**). The median of recall and precision of each  
624 method across all topologies and all parameter settings are displayed in **Fig. 3a**. We also  
625 summarize the median standard deviation of recall and precision in **Supplementary Fig. 16**.  
626 Note that the standard deviation in recall and precision reflects variation due to both different  
627 data sets and different node orderings. Except for QPSO, the methods under comparison do not  
628 differ much in variation. QPSO had a larger variation because only 20 data sets were used for  
629 assessing the performance (due to long runtime).

630

631 **Simulation under the complex topology with heterogeneous signal strengths.** The simulation  
632 strategy described above assumes the same signal strength (value of  $\gamma$ , the coefficient of the  
633 parent node) across the network, which allows us to examine the performance of the methods in  
634 simple and well-controlled settings. For the complex strategy, we further allowed the values of  $\gamma$   
635 to vary when generating data for each node. Each  $\gamma$  has equal probability of taking on one of  
636 three values: 0.2, 0.5 and 1.0. Similar to the procedure described above, we also generated 1000  
637 data sets with this strategy, applied relevant methods, and computed recall and precision.

638

639 **Recall and precision.** Under the standard definition:

640 
$$\text{Recall} = (\# \text{ edges correctly identified in inferred graph}) / (\# \text{ edges in true graph});$$

641 
$$\text{Precision} = (\# \text{ edges correctly identified in inferred graph}) / (\# \text{ edges in inferred graph}).$$

642 However, we consider it more important to be able to identify the presence of an edge than to  
643 also get the direction correct. Therefore, we assign 1 to an edge with the correct direction and 0.5 to  
644 an edge with the wrong direction or no direction. For example, when the true graph is  
645  $V \rightarrow T_1 \rightarrow T_2$  with 2 true edges, and the inferred graphs are i)  $V \rightarrow T_1 \rightarrow T_2$ , and  $V \rightarrow T_2$ ; ii)  
646  $V \rightarrow T_1 - T_2$ ; and iii)  $V \rightarrow T_1 \leftarrow T_2$ , the number of correctly identified edges is then 2, 1.5 and 1.5,  
647 respectively. Recall is calculated to be  $2/2=100\%$ ,  $1.5/2=75\%$ , and  $1.5/2=75\%$ , respectively,  
648 whereas precision is  $2/3=67\%$ ,  $1.5/2=75\%$ , and  $1.5/2=75\%$ , respectively.

649

650 When analyzing the complex topology in simulation, which involves correlated genetic variants,  
651 we ignored the edges among genetic variants in the calculation of recall and precision, since  
652 mmhc and pc are not designed to infer the relationships among genetic variants correctly. findr  
653 and cit are not applicable to this topology, and QPSO requires the graph skeleton as the input,

654 with the graph skeleton already specifying the relationship among genetic variants and between  
655 variants and their associated genes.

656

657 **Application of findr and cit.** Unlike mmhc and pc that learn the graph skeleton first and orient  
658 the edges next, findr and cit test for directed edges in a single step for a triplet of nodes (the  
659 genetic variant and two gene expression nodes). This means that in order to learn the topology,  
660 we needed to examine all possible gene pairs (e.g.,  $T_1$  and  $T_2$ ; and  $T_2$  and  $T_1$ ) and then apply  
661 findr or cit to the triplet of each of the gene pairs and the genetic variant. Based on the hypothesis  
662 testing result from findr or cit, if there was evidence for a directed edge between two nodes, we  
663 added 1 to the current value in the adjacency matrix for those two nodes. Otherwise we left the  
664 value unchanged. After examining all gene pairs, we converted all positive values in the  
665 adjacency matrix to 1 to represent a directed edge. This way, no edges inferred would be  
666 eliminated in later tests. We then calculated the aSHD between the inferred adjacency matrix and  
667 that of the true graph, and averaged the aSHDs across simulated data sets.

668

669 Although findr aims to compute a causality probability for a triplet, its current implementation  
670 for this calculation cannot be applied to small graphs, or cases where multiple genes share the  
671 same eQTL and where some of the genes do not have eQTLs. We therefore used the function  
672 `findr.pijs_gassist_pv()` from the R package findr to conduct five hypothesis tests (the p values  
673 from these five tests are then converted to a causality probability) for each ordered gene pair with  
674 the genetic variant. Consider a triplet  $V_1$ ,  $T_1$  and  $T_2$ . The null ( $H_0$ ) and alternative ( $H_a$ )  
675 hypotheses of these five tests are:

676 Test #1:  $H_0$ :  $V_1$  and  $T_1$  independent;  $H_a$ :  $V_1 \rightarrow T_1$ ;

677 Test #2:  $H_0$ :  $V_1$  and  $T_2$  independent;  $H_a$ :  $V_1 \rightarrow T_2$ ;

678 Test #3:  $H_0$  (M1):  $V_1 \rightarrow T_1 \rightarrow T_2$ ;  $H_a$ :  $V_1 \rightarrow T_1$ ,  $V_1 \rightarrow T_2$ ,  $T_1 \rightarrow T_2$ ;

679 Test #4:  $H_0$  (M0):  $V_1 \rightarrow T_1$ , both independent of  $T_2$ ;  $H_a$ :  $V_1 \rightarrow T_1$ ,  $V_1 \rightarrow T_2$ ,  $T_1 \rightarrow T_2$ ;

680 Test #5:  $H_0$  (M3):  $V_1 \rightarrow T_1$ ,  $V_1 \rightarrow T_2$ ;  $H_a$ :  $V_1 \rightarrow T_1$ ,  $V_1 \rightarrow T_2$ ,  $T_1 \rightarrow T_2$ .

681 We extract the p values (i.e.,  $p_i, i = 1, \dots, 5$ ) for the five tests. The data supports M0, if  $p_1$  is less  
682 than, and  $p_2$  and  $p_4$  greater than a certain threshold. The data supports M1, if  $p_1$  is less than, and  
683  $p_3$  greater than a certain threshold. The data supports M3, if  $p_1$  and  $p_2$  are less than, and  $p_5$   
684 greater than a certain threshold. We determine the p value threshold with Bonferroni correction,  
685 dividing the unadjusted p value 0.05 by  $5m$ , where  $m$  is the total number of genes pairs, because  
686 each findr test contains five tests.

687  
688 cit generates an omnibus p value for testing whether the triplet follows M1. We used the function  
689 `cit.cp()` from the R package `cit` for calculation of the omnibus p value. Similarly, we determine  
690 the p value threshold also with Bonferroni correction (unadjusted p value 0.05 divided by the  
691 total number of genes pairs).

692  
693 **Analysis of the GEUVADIS data.** The GEUVADIS project  
694 (<http://www.ebi.ac.uk/Tools/geuvadis-das/>) performed RNA-seq (gene expression) on 373  
695 Europeans and 89 Africans from the 1000 Genomes Project. The GEUVADIS project combined  
696 the gene expression data with the genotype data, and identified eQTLs across the human genome.  
697 Among the most stringent set of eQTLs, 62 have more than one target gene. We extracted the  
698 genotypes of these eQTLs and the expression of the target genes in the 373 Europeans, and  
699 applied MRPC to each eQTL with its target genes.

700

701 The SNP rs479844, which has GWAS significance, is identified in the European sample to be  
702 the best eQTL for genes OVOL1 and AP5B1. However, this SNP is not identified to be the  
703 eQTL of any gene in the African sample. No eQTLs are reported for these two genes in the  
704 African sample. When we further examined the correlation matrices (**Supplementary Figure 17**)  
705 between the SNP genotype and expression of the two genes from the two samples, they have  
706 qualitative differences: whereas the eQTL has a much stronger correlation with OVOL1 than  
707 with AP5B1 in Europeans, it is the reverse in Africans. However, these differences are likely due  
708 to the small sample size of the African sample. We therefore do not seek to replicate with the  
709 African sample the topology we identified in the European sample.

710

711 Also because of the small sample size of the African sample, eQTLs and genes identified to have  
712 eQTLs are very different in the two populations. In order to examine whether it is possible at all  
713 to replicate the causal network inference from the European sample, we focused on the five top  
714 eQTLs identified in both samples: namely, esv2658282, esv2676246, rs11305802, rs230326, and  
715 rs7663027. The pairwise correlation matrices (**Supplementary Figure 18**) for each eQTL in the  
716 two samples are largely similar. However, due to the difference in the sample size, the topology  
717 inferred from the African sample is usually part (**Supplementary Figure 19**) of that from the  
718 European sample.

719

720 **Analysis of the GTEx data.** The GTEx consortium has profiled genotypes and gene expression  
721 levels in 53 tissues across 714 donors (Release V7, dbGaP Accession phs000424.v7.p2;  
722 <https://www.gtexportal.org/home/>). We extracted the gene expression data of the LCLs, and the



723 genotype data of the eQTLs used in the GEUVADIS analysis. Since GTEx uses chromosome  
724 locations to identify genetic variants, we extracted the coordinates of the GEUVADIS eQTLs in  
725 Ensemble (GRCh 37; <https://grch37.ensembl.org/index.html>) using the rs IDs. Not all  
726 GEUVADIS eQTLs can be found in the GTEx samples. Among eQTLs that can be found in the  
727 GTEx samples, not all their associated genes have expression measurements. In the end, we  
728 found 40 eQTL-gene sets with data available in both GEUVADIS and GTEx LCLs  
729 (**Supplementary Table 4**). For each of these sets, we ran MRPC with an FDR of 0.05, and  
730 summarized the results in **Supplementary Table 4**. For those sets that were inferred to have an  
731 M1 model by MRPC in GEUVADIS, we also ran function `findr.pijs_gassist_pv()` from the R  
732 package `findr`, and function `cit.cp()` from the R package `cit` on each set to test whether there is a  
733 causal model as in  $V_1 \rightarrow T_1 \rightarrow T_2$  or  $V_1 \rightarrow T_2 \rightarrow T_1$  (**Supplementary Table 5**).

734

735 The Genotype-Tissue Expression (GTEx) Project was supported by the Common Fund of the  
736 Office of the Director of the National Institutes of Health, and by NCI, NHGRI, NHLBI, NIDA,  
737 NIMH, and NINDS. The gene expression data used for the analyses described here were  
738 obtained from the GTEx Portal (<https://www.gtexportal.org/home/datasets>;  
739 `GTEx_Analysis_2016-01-15_v7_RNASeQCv1.1.8_gene_tpm.gct.gz`) on 10/24/2017, the  
740 genotype data were available through dbGaP accession number phs000424.v7.

741

742 **Analysis of the TCGA breast cancer data.** We used the frequently altered genes identified  
743 earlier<sup>39</sup> for this analysis. We downloaded the copy number variation, expression and  
744 methylation data for these genes from cBioPortal (<http://www.cbioportal.org/>), which provides  
745 processed and normalized data. We also downloaded the clinical data of the breast cancer

746 patients from the TCGA website (<https://cancergenome.nih.gov/>). Using the clinical data, we  
747 selected 566 patients that were ER+, were identified as white, and also had genetic and  
748 molecular data, for our analysis.

749

750 **Adjusted Structural Hamming Distance (aSHD).** The SHD, as is implemented in the R  
751 package `pcalg`<sup>26</sup> and `bnlearn`<sup>25</sup>, counts how many differences exist between two directed graphs.  
752 This distance is 1 if an edge exists in one graph but missing in the other, or if the direction of an  
753 edge is different in the two graphs. The larger this distance, the more different the two graphs are.  
754 Similar to our approach to recall and precision (see “Recall and precision” in Methods), we  
755 adjusted the SHD to reduce the penalty on the wrong direction of an edge to 0.5. For example,  
756 between two graphs  $V \rightarrow T_1 \leftarrow T_2$  and  $V \rightarrow T_1 \rightarrow T_2$ , the SHD is 1 and our aSHD is 0.5. By contrast,  
757 between graphs  $V \rightarrow T_1 \leftarrow T_2$  and  $V \rightarrow T_1, T_2$  (no edge between  $T_1$  and  $T_2$ , or between  $V$  and  $T_2$ ),  
758 both the SHD and aSHD are 1. Therefore, our adjustment penalizes the wrong direction less than  
759 the wrong inference of the edge.

760

761 **Properties of MRPC.** A causal graph with a mixture of directed and undirected edges is  
762 essentially an equivalent class of directed acyclic graphs (DAGs) that have the same likelihood.  
763 However, the search problem of learning the DAG with the highest likelihood when the number  
764 of parent nodes is greater than 1 has been proven to be NP-complete<sup>51</sup>, the hardest computational  
765 problem. Learning even just the equivalent classes of a DAG with the number of parent nodes  
766 being greater than 1 is also NP-complete<sup>52</sup>, as the space of equivalent classes of DAGs is super-  
767 exponential<sup>49</sup> in the number of nodes. Therefore, the PC algorithm and similar algorithms get  
768 around the computational issue with local searches. Although it is not known theoretically that

769 these PC algorithms achieve the global optimality defined by, for example, the likelihood, it has  
770 been shown that the PC algorithm is consistent<sup>49</sup>: with a large sample size, the PC algorithm is  
771 expected to recover the true graph. In particular, consistency of the PC algorithm is essentially  
772 consistency of the step of graph skeleton inference, as this step contains all the statistical  
773 inference<sup>53</sup>. Since MRPC uses essentially the same procedure for skeleton inference as the PC  
774 algorithm, MRPC is also consistent.

775  
776 **MRPC and other PMR-based methods.** Although our MRPC employs the PMR, it is  
777 fundamentally different from other PMR-based methods. Most of the methods incorporating the  
778 PMR fall into two classes. One class, including *cit* and *findr*, is called *mediation-based methods*  
779 that require individual-level data, generally do not estimate the causal effect sizes, and can infer  
780 networks of multiple phenotypes (e.g., a network of gene expression). The other class of  
781 methods are called *MR methods*<sup>22</sup> that can be applied to individual-level data as well as summary  
782 statistics, estimate the causal effect sizes, and generally focus on three-node graphs with one  
783 node being the genetic variant, and the other two nodes being phenotypes of interest. Both  
784 classes of methods employ the PMR and focus on the “causal model”, in which exposure acts as  
785 the mediator. Although our MRPC method is closer to the mediation-based methods according  
786 to the characteristics described above, the notion of “mediation” is less relevant to our method;  
787 only Model 1 considers the “causal model”, and therefore one of the two genes acts as the  
788 mediator (**Fig. 1a**). More importantly, with our method we consider the PMR as a way to define  
789 plausible causal relationships and to put constraints on the space of possible graphs. As a result,  
790 our method can recover a variety of causal relationships, instead of the few that other PMR-  
791 based methods can identify (**Fig. 2b**).

792

793 **Analysis of the DREAM5 Systems Genetic Challenge A data.** This challenge  
794 (<https://www.synapse.org/#!/Synapse:syn2820440/wiki/>) provided gene expression and genotype  
795 data simulated for 1000 genes in five different directed networks for each of three sample sizes  
796 (100, 300 and 999). We focused on networks labeled ‘net1’ of each sample size. These three  
797 networks each contain around 2000 directed edges between gene expression. We applied MRPC  
798 to these three data sets. We ran MRPC with FDR=0.3 and TRANSWESD<sup>48</sup> with default  
799 parameters. True positives (1 for an edge with the correct direction, and 0.5 for an edge not with  
800 the correct direction), false positives, recall and precision are summarized in **Supplementary**  
801 **Table 10**. We set the FDR to be 0.3 for MRPC because results from TRANSWESD had a high  
802 FDR of 64-84%. Setting a low FDR in MRPC also led to fewer edges to be recovered. For the  
803 data set with the largest sample size (999), we also ran mmhc, since mmhc has the second best  
804 performance in our simulation, and summarized the statistics in this table.

805

806 **Code availability.** MRPC is implemented in an R package (v1.0.0) at

807 <https://github.com/audreyqyfu/mrpc/releases>.

808

809 49. Kalisch M, Bühlmann P. Estimating high-dimensional directed acyclic graphs with the  
810 PC-algorithm. *J Mach Learn Res* **8**, 613-636 (2007).

811

812 50. van Buuren S, Groothuis-Oudshoorn K. mice: Multivariate imputation by chained  
813 equations in R. *J. Stat. Softw.* **45**, 67 (2011).

814

815 51. Hoffgen K. Learning and robust learning of product distributions. *Technical Report 464,*  
816 *Fachbereich Informatik, Universitat Dortmund* (1993).

817

818 52. Chickering DM. Learning Bayesian networks is NP-complete. In: *Fisher D, Lenz HJ (eds)*  
819 *Learning from Data Lecture Notes in Statistics, vol 112 Springer, New York, NY*, 121-130  
820 (1996).

821  
822 53. Meek C. Causal inference and causal explanation with background knowledge. In  
823 P.Besnard and S.Hanks, editors. *Uncertainty in Artificial Intelligence* **11**, 403–410 (1995).  
824

## 825 **ACKNOWLEDGMENTS**

826 We thank Jonathan Pritchard, Anand Bhaskar, Towfique Raj, Boxiang Liu, Deigo Calderon, and  
827 Xiaoyue Wang for helpful discussions, Boxiang Liu for processing the GTEx genotype data, and  
828 Diego Calderon for detailed and constructive comments on an earlier version of the paper. We  
829 also thank Lingfei Wang for help with the findr package, Huange Wang for providing the QPSO  
830 code, and Thomas Cokelaer for help with the DREAM5 Challenge data and scoring strategy.  
831 This research is supported by NIH R00HG007368 (to A.Q.F.) and partially by the NIH/NIGMS  
832 grant P20GM104420 to the Center for Modeling Complex Interactions at the University of Idaho.

## 833 **AUTHOR CONTRIBUTIONS**

834 A.Q.F. conceived project. M.B.B. and A.Q.F. developed the method. M.B.B. implemented the  
835 software. M.B.B. and A.Q.F. performed all the analyses and wrote the manuscript.

836

## 837 **COMPETING FINANCIAL INTERESTS**

838 The authors declare no competing financial interests.

839

840

841

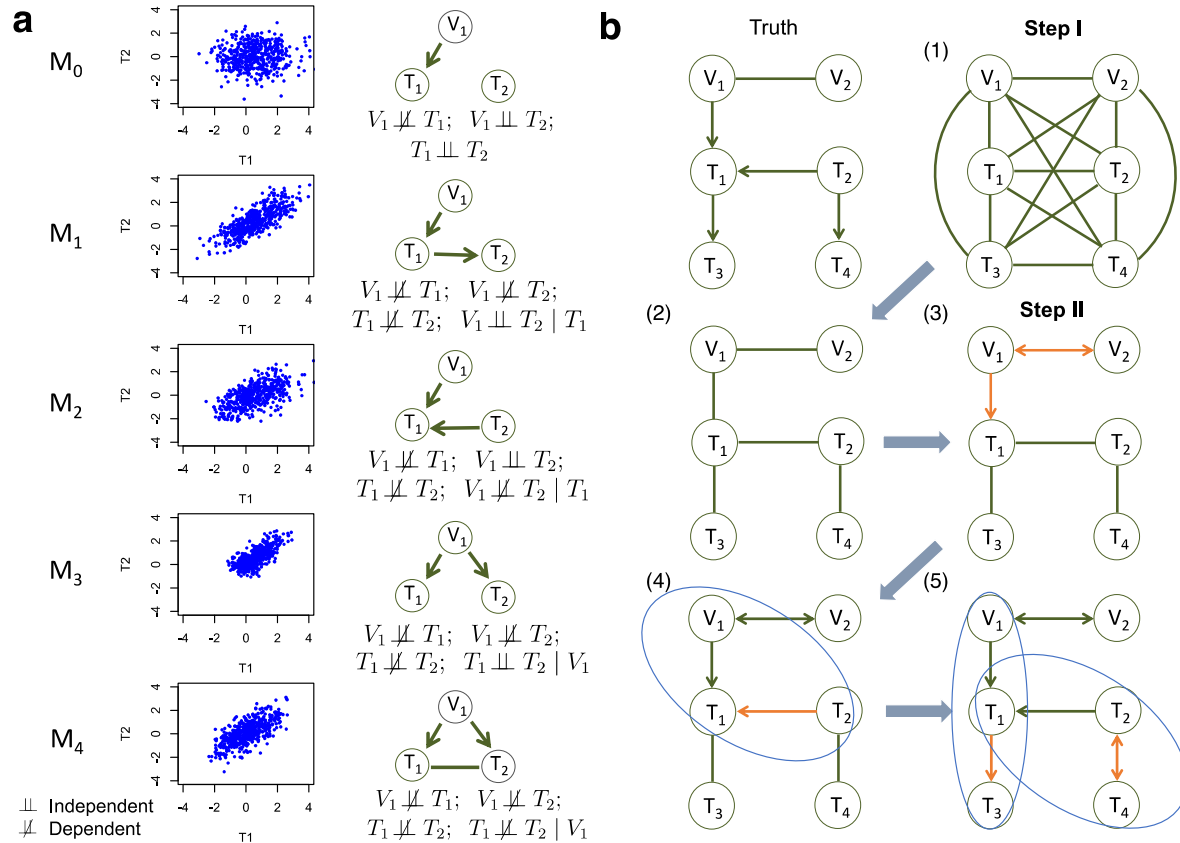

842

843

844 **Figure 1: Five basic topologies under the principal of Mendelian randomization and the**  
 845 **MRPC algorithm.** (a) Each topology involves three nodes: a genetic variant ( $V_1$ ), and two  
 846 molecular phenotypes ( $T_1$  and  $T_2$ ). Directed edges indicate direction of causality, and undirected  
 847 edges indicate that the direction is undetermined (or equivalently, both directions are equally  
 848 likely). For each topology (or model), a scatterplot between the two phenotypes is generated  
 849 using simulated data, the topology is shown, and the marginal and conditional dependence  
 850 relationships are given.  $M_0$  is the null model where  $T_1$  and  $T_2$  are marginally independent, and  
 851 therefore the scatterplot does not show correlation. All the other models show scatterplots with  
 852 similar levels of correlation. Our MRPC can distinguish the non-null models despite similar  
 853 correlation. (b) The MRPC algorithm consists of two steps (see details in [Supplementary Figs 1](#)

854 **and 2).** In Step I, it starts with a fully connected graph shown in (1), and learns a graph skeleton  
855 shown in (2), whose edges are present in the final graph but are undirected. In Step II, it orients  
856 the edges in the skeleton in the following order: edges involving at least one genetic variants (3),  
857 edges in a v-structure (if v-structures exist) (4), and remaining edges, for which MRPC  
858 iteratively forms a triplet and checks which of the five basic models under the PMR is consistent  
859 with the triplet (5). If none of the basic models matches the triplet, the edge is left unoriented  
860 (shown as bidirected).

861

862

863

864

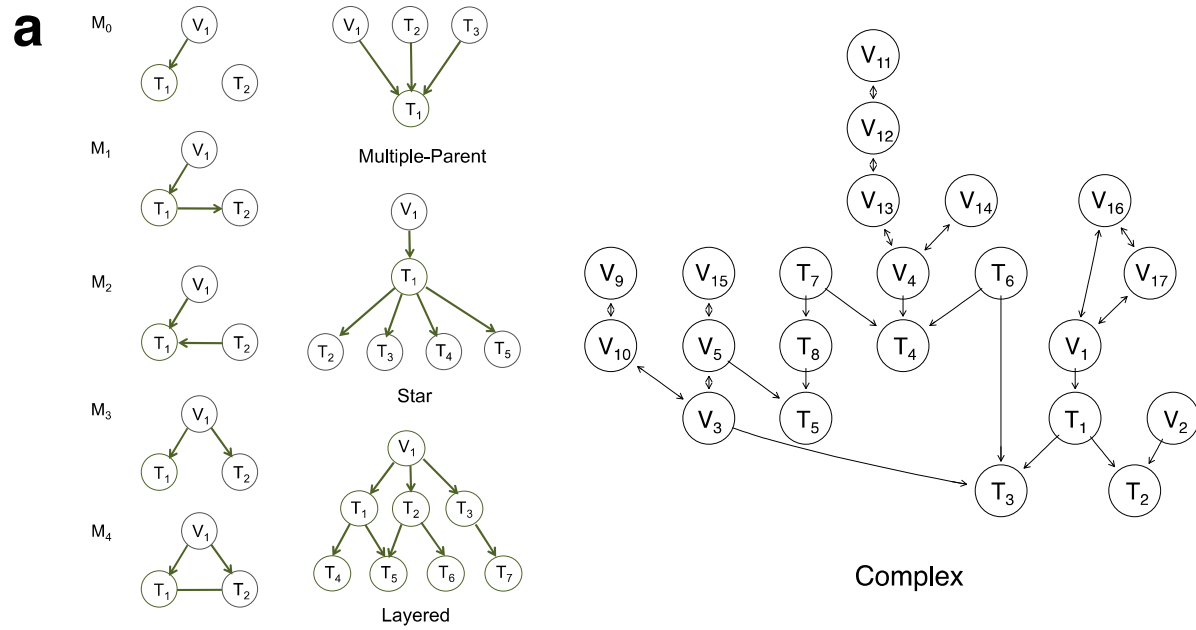

**b**

|              | MRPC | mmhc | pc | findr | cit | QPSO* |
|--------------|------|------|----|-------|-----|-------|
| $M_0$        | ✓    | ✓    | ✓  | ✓     | ✗   | ✗     |
| $M_1$        | ✓    | ✓    | ✓  | ✓     | ✓   | ✓     |
| $M_2$        | ✓    | ✓    | ✓  | ✗     | ✗   | ✓     |
| $M_3$        | ✓    | ✓    | ✓  | ✓     | ✗   | ✗     |
| $M_4$        | ✓    | ✓    | ✓  | ✗     | ✗   | ✓     |
| Multi-parent | ✓    | ✓    | ✓  | ✗     | ✗   | ✓     |
| Star         | ✓    | ✓    | ✓  | ✓     | ✓   | ✓     |
| Layered      | ✓    | ✓    | ✓  | ✓     | ✓   | ✓     |
| Complex      | ✓    | ✓    | ✓  | ✗     | ✗   | ✓     |



866

867 **Figure 2: Comparison of MRPC with other methods on simulated data.** (a) Topologies used  
868 to generate synthetic data (see “Generating simulated data” in Methods). (b) Table summarizing  
869 graphs to which each method under comparison is applicable. \*Note that QPSO does not learn  
870 the causal graph from scratch. Instead, it takes a graph skeleton as the input and seeks the  
871 optimal orientation of the edges in this undirected network. Edges involving genetic variants  
872 need to be already oriented in the skeleton. Therefore, QPSO does not identify  $M_0$  or  $M_3$ .

873

**a**

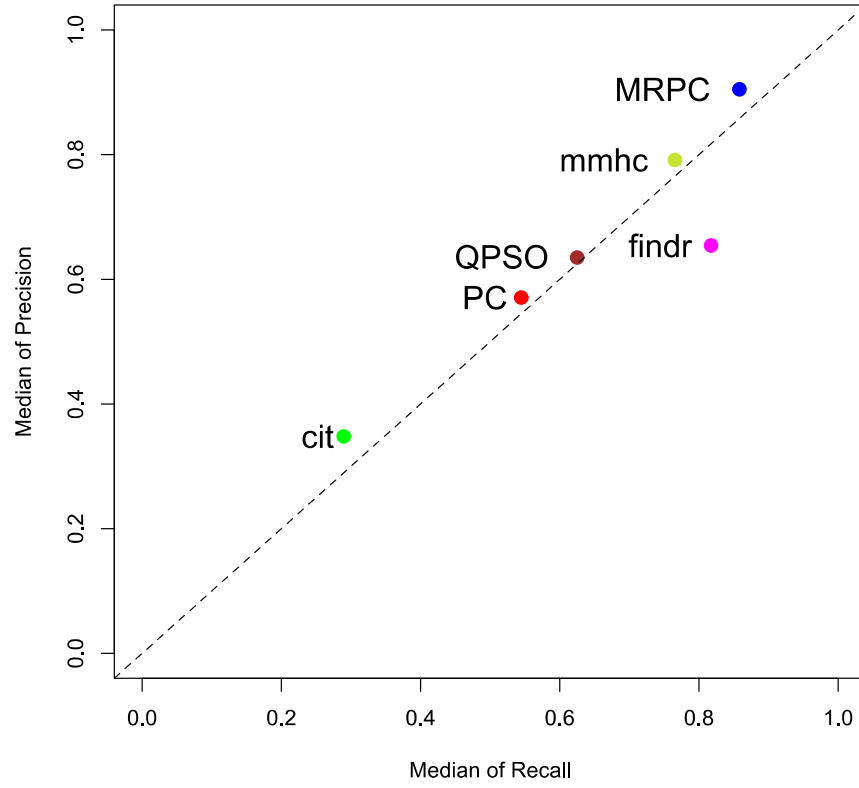

**b**

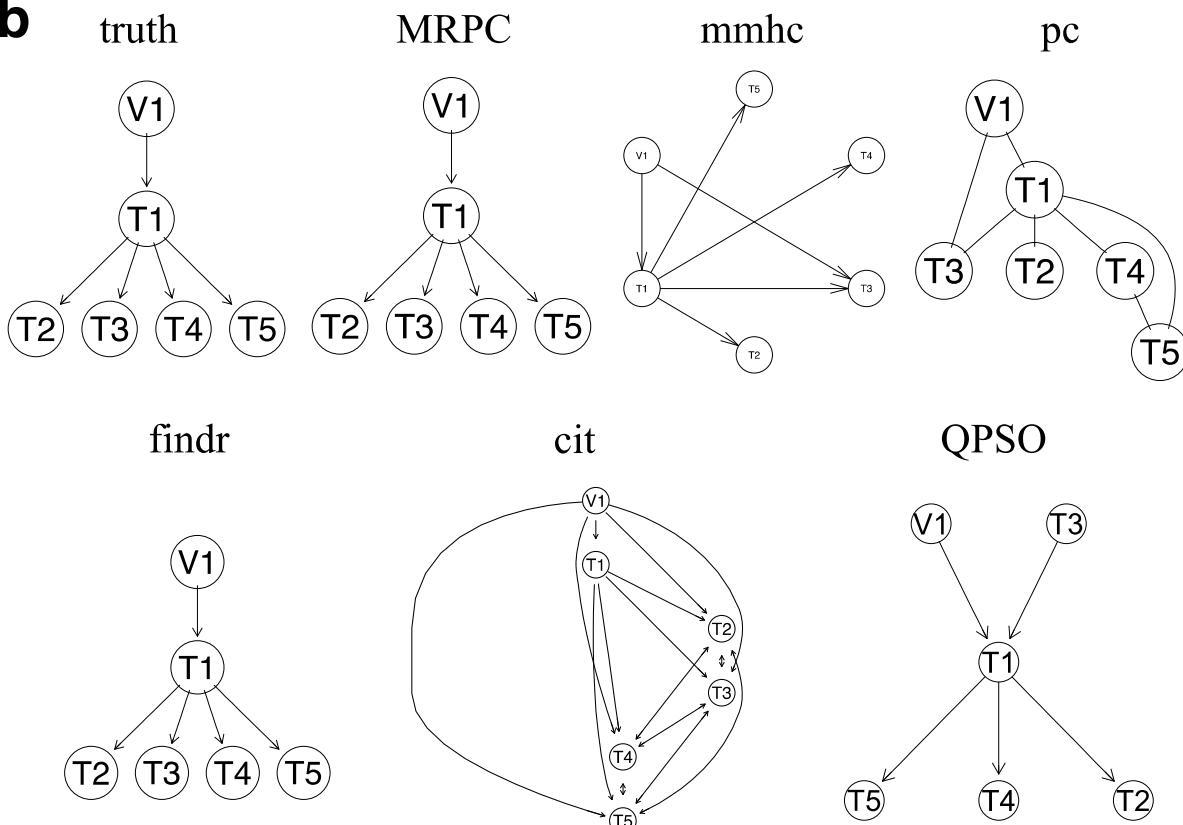

874

875 **Figure 3: Results of method comparison on simulated data.** (a) Median recall and precision  
876 over all parameter settings. For each of the topologies in **Fig. 2a**, 1000 datasets were generated  
877 for three different signal strengths ( $\gamma$ , which is the coefficient of parent nodes in the linear model;  
878 see Methods for simulation details) and four different sample sizes ( $n$ ). Each of the six methods  
879 was applied where possible and the recall and precision were calculated for the inferred graph  
880 relative to the truth. The median of all the mean recall (or precision) is used as a metric of the  
881 overall performance of the method. Note that only 20 datasets were used for QPSO in each  
882 parameter setting due to long runtime. (b) An example of inferred graphs from all six methods  
883 on data simulated under a star model with a large sample size ( $n = 1000$ ) and strong signal  
884 ( $\gamma = 1.0$ ).

885

886

887

888

889

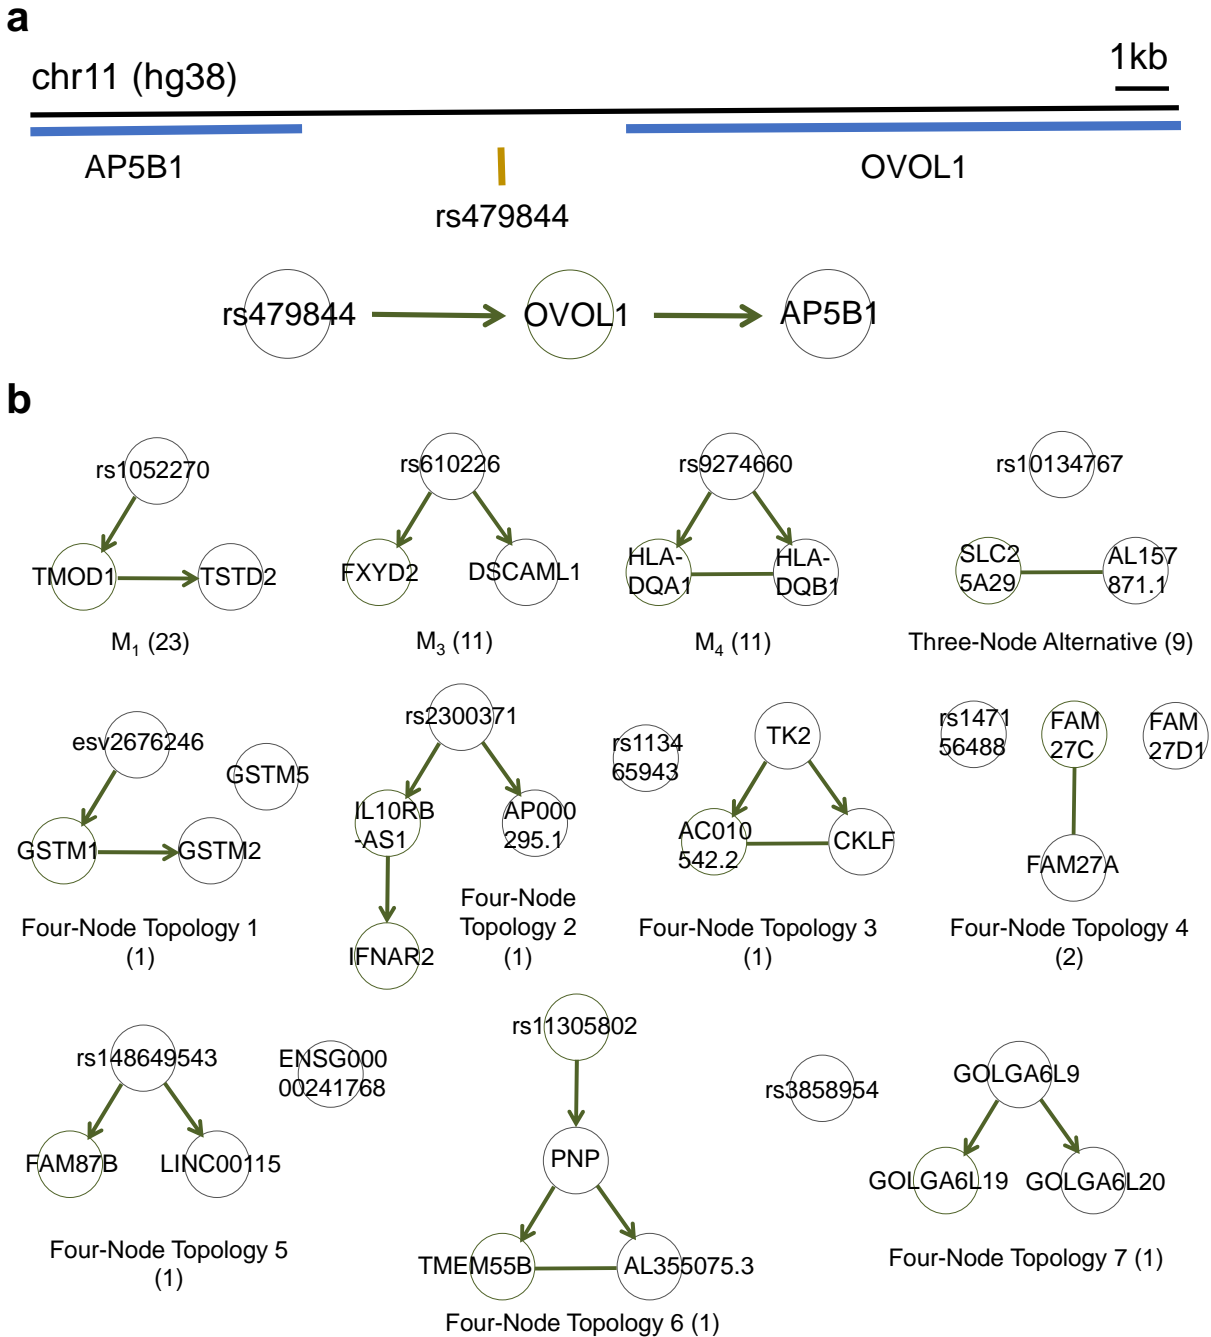

890

891 **Figure 4: MRPC distinguishes direct and indirect target genes of eQTLs in the GEUVADIS**

892 **data for the European cohort. (a)** rs479844 is a GWAS significant SNP for atopic march in the

893 GWAS Catalog, and an eQTL identified in GEUVADIS for two genes. **(b)** MRPC learns 11

894 distinct topologies among associated genes for eQTLs. The number in parentheses are the

895 number of eQTL-gene sets with the corresponding inferred topology.

896

897

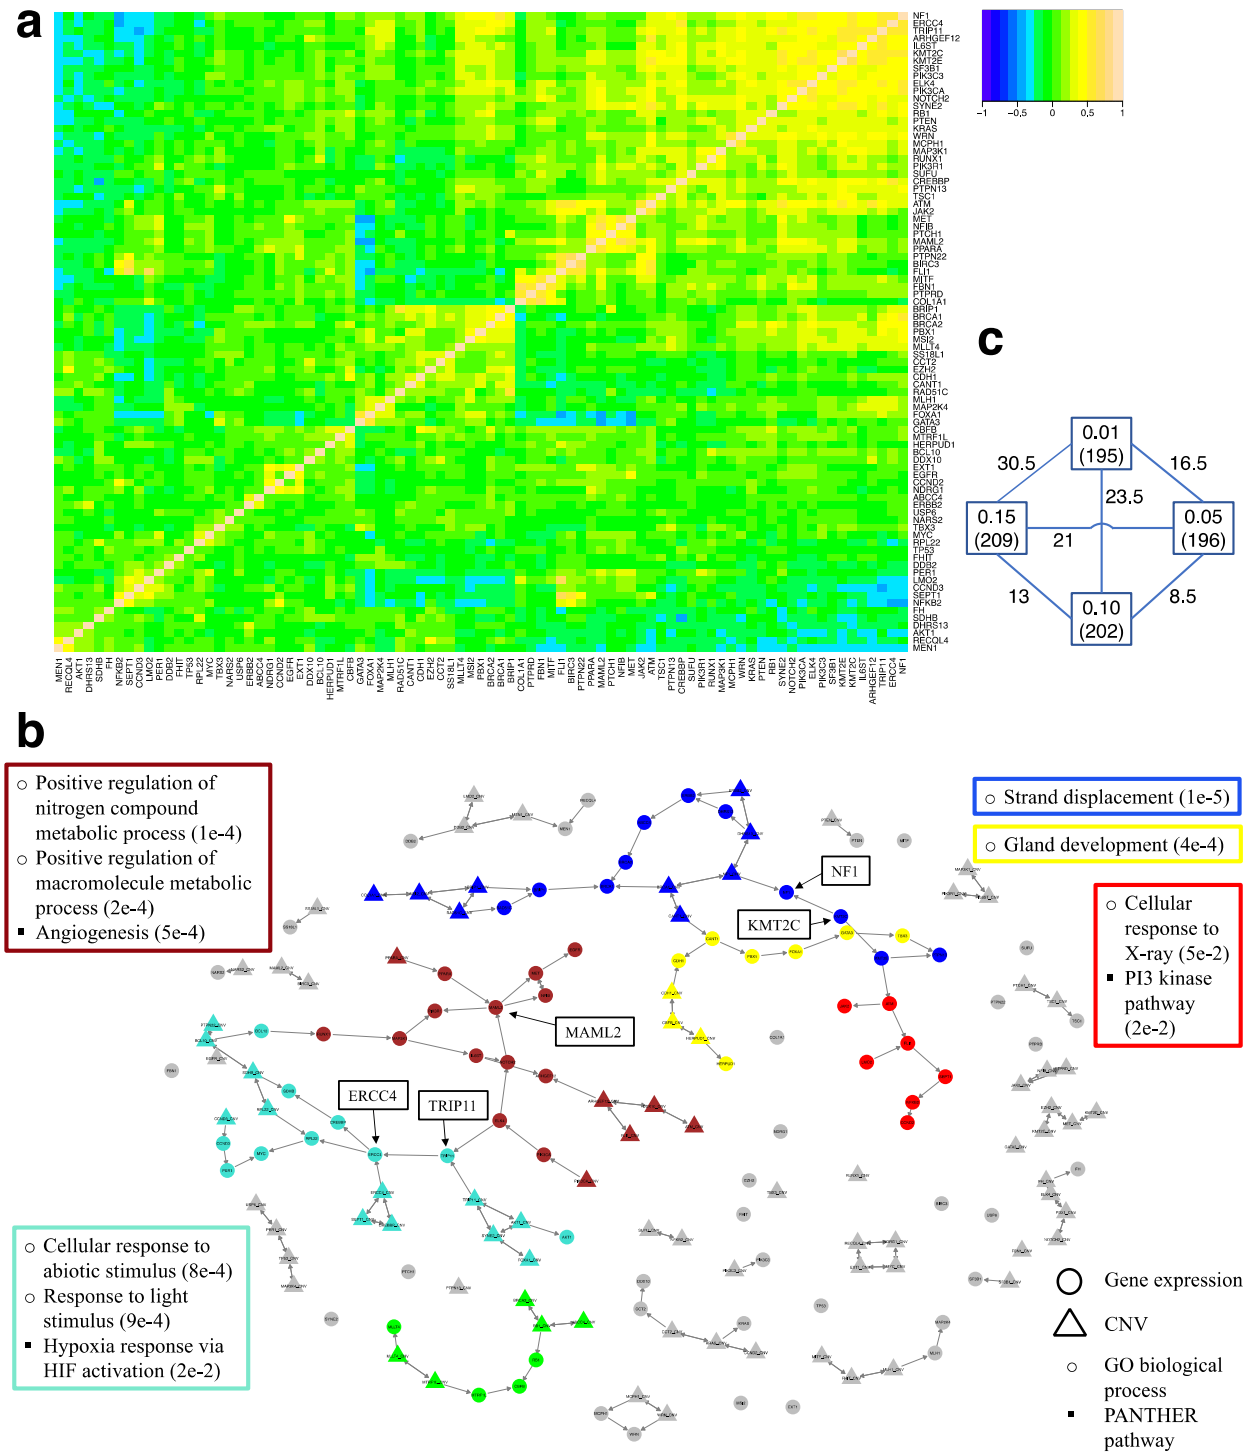

898

899 **Figure 5: MRPC learns a causal regulatory network for frequently altered cancer genes**

900 **using the TCGA breast cancer data. (a) Pearson correlation heatmap for the 85 genes with**

901 **hierarchical clustering in rows and columns. (b) The causal network inferred at FDR of 5% by**

902 MRPC. Modules were identified by WGCNA, such that each non-grey module contains at least  
903 seven nodes and four genes. Grey nodes were not assigned to any module. For each module, the  
904 box with the corresponding color contains the top GO biological processes and PANTHER  
905 pathways (if exist) enriched for the module, with p values in parentheses (complete results in  
906 **Supplementary Tables 8, 9**). (c) Distances between networks inferred by MRPC at different  
907 values of FDR. The square indicates the FDR with the total number of edges in parentheses, and  
908 the numbers on the lines are the adjusted Structural Hamming Distance (aSHD) between two  
909 graphs (see “Adjusted Structural Hamming Distance (aSHD)” in Methods). These numbers  
910 demonstrate the stability of the MRPC inference; see main text for detail.

911

912

913
